# Supplementary material
Source: PubMed Central journal article supplement (PMC2747977)
Supplement: supp_29_19_5339__2.pdf [file supp_29_19_5339__2.pdf]

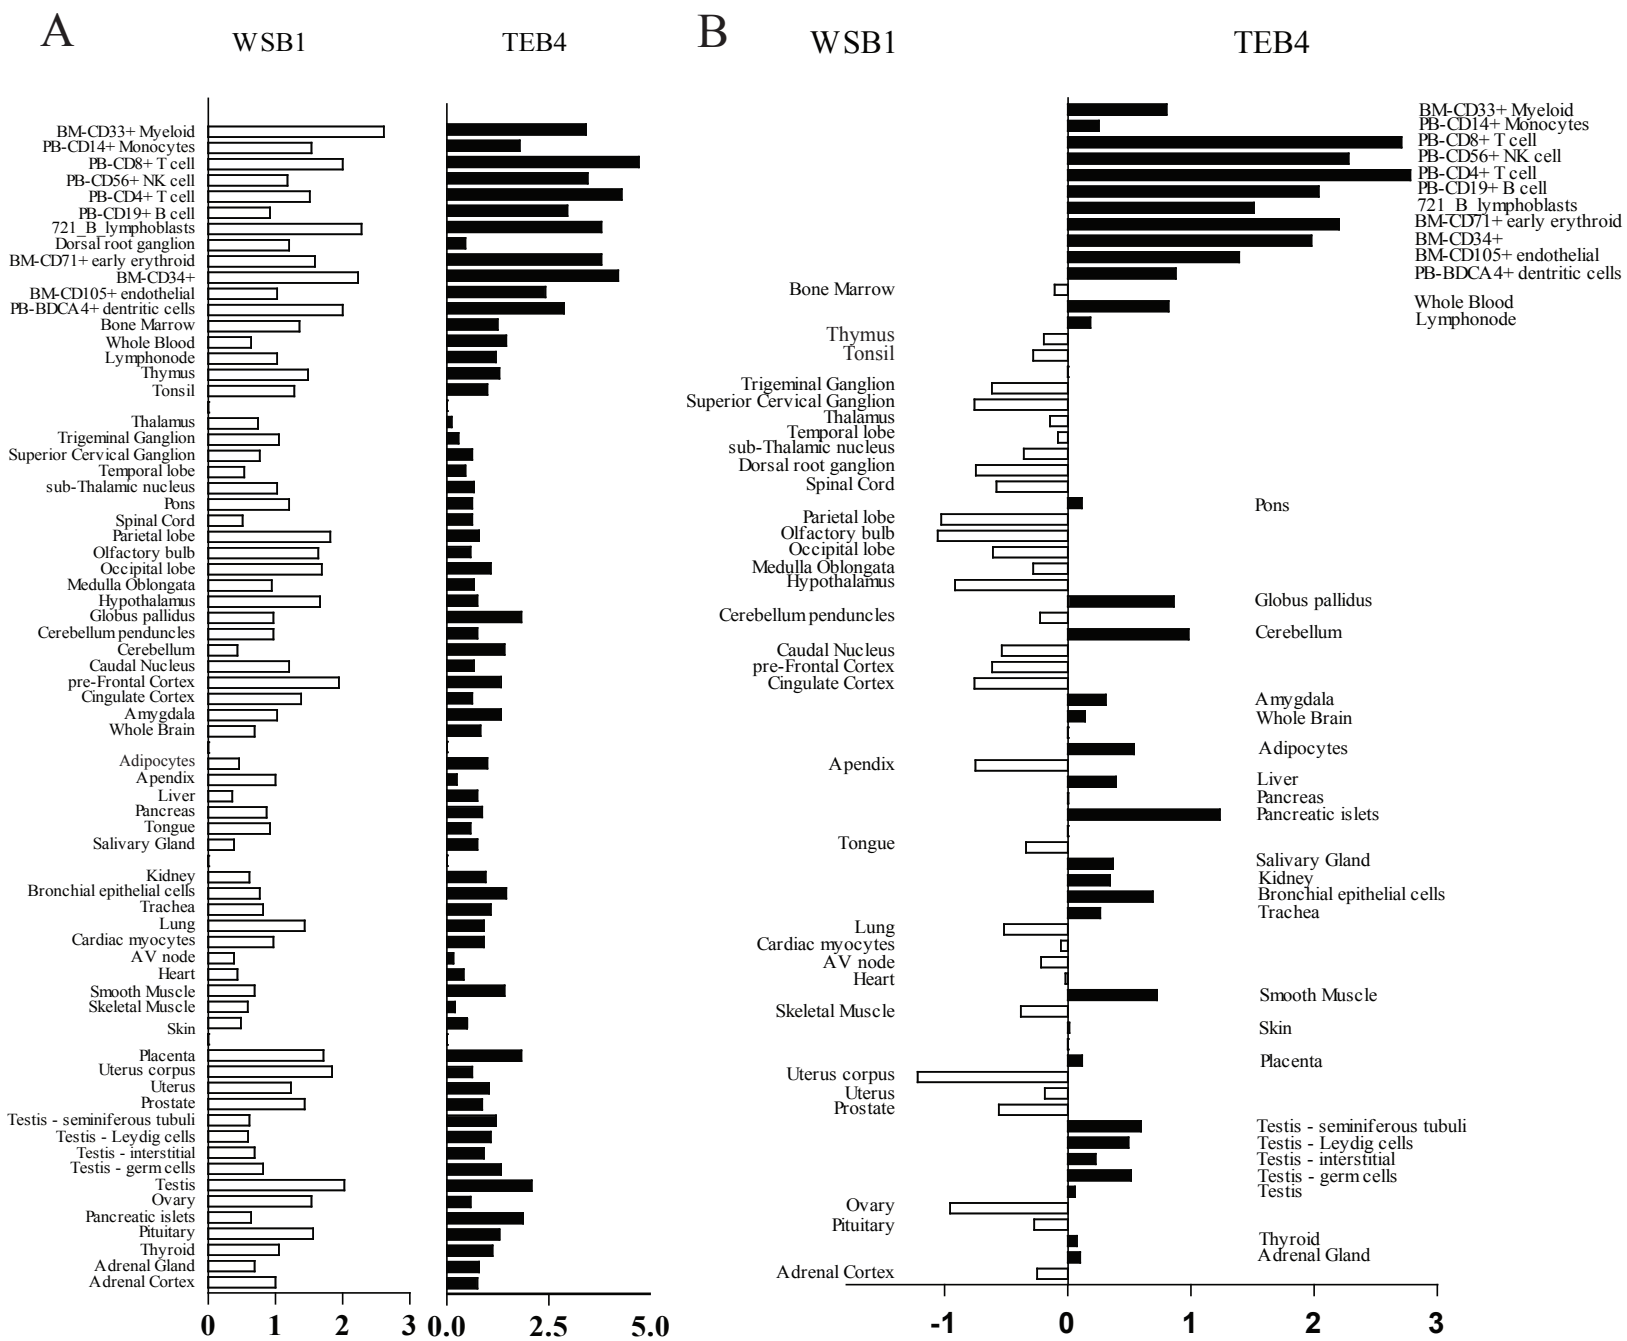

**Supplemental Figure 2. Expression of TEB4 and WSB-1 in human tissues.** (A) TEB4 and WSB-1 tissue expression obtained from SymAtlas web site (<http://symatlas.gnf.org/SymAtlas/>). (B) Relative tissue expression of TEB4 vs. WSB-1 was determined by subtracting the relative expression of TEB4 to its median from the relative expression of WSB-1 to its median. Tissues that predominantly express higher levels of TEB4 relative to its mean have positive values and are indicated by black bars, while tissues that express higher levels of WSB-1 to its mean are represented as negative values and are indicated by white bars.
